# Supplementary material
Source: PubMed Central journal article supplement (PMC1767660)
Supplement: heart_89_5_577__1.pdf [file heart_89_5_577__1.pdf]

## Web-only References

1. Abrams B, Sklaver A, Hoffman T, Greenman R. Single or combination therapy of staphylococcal endocarditis in intravenous drug abusers. *Ann Intern Med* 1979;90(5): p789-91.
2. Adler A, Blumberg E, Schwartz D, Russin S, Pepe R. Seven-pathogen tricuspid endocarditis in an intravenous drug abuser. Pitfalls in laboratory diagnosis. *Chest* 1991;99(2): p490-1.
3. Aguilar JA, Summerson C. [Infective endocarditis in intravenous drug addicts]. *Arch Inst Cardiol Mex* 2000;70(4):384-90.
4. Altucci P, Abbate GF, Ciaramella F, Gallo C, Iacono A, Giannini V, et al. [Changed etiopathogenic and clinical features of infective endocarditis]. *Cardiologia* 1994;39(12 Suppl 1):255-60.
5. Anderson J, Scott P, Nair R. Conservative surgery in multiple cusp involvement in tricuspid valve endocarditis. *Br Heart J* 1991;66(3): p244-5.
6. Bayer AS, Ward JI, Ginzton LE, Shapiro SM. Evaluation of new clinical criteria for the diagnosis of infective endocarditis. *Am J Med* 1994;96(3):211-9.
7. Benveniste O, Bruneel F, Bedos J, Wolff M, Leseche G, Leport C, et al. Ruptured mycotic pulmonary artery aneurysm: an unusual complication of right-sided endocarditis. *Scand J Infect Dis* 1998;30(6):626-9.
8. Berger M, Delfin LA, Jelveh M, Goldberg E. Two-dimensional echocardiographic findings in right-sided infective endocarditis. *Circulation* 1980;61(4):855-61.
9. Bruneel F, D'Estanque J, Fournier PE, Arlet G, Thuong M, Wolff M, et al. Isolated right-sided *Bartonella quintana* endocarditis in an immunocompetent adult. *Scand J Infect Dis* 1998;30(4):424-5.
10. Carozza A, Renzulli A, De Feo M, Ismeno G, Della Corte A, Dialetto G, et al. Tricuspid repair for infective endocarditis: clinical and echocardiographic results. *Tex Heart Inst J* 2001;28(2):96-101.
11. Chambers HF, Morris DL, Tauber MG, Modin G. Cocaine use and the risk for endocarditis in intravenous drug users. *Ann Intern Med* 1987;106(6):833-6.
12. 1. Chambers HF, Korzeniowski OM, Sande MA. *Staphylococcus aureus* endocarditis: clinical manifestations in addicts and nonaddicts. *Medicine (Baltimore)* 1983;62(3):170-7.
13. Currie PF, Sutherland GR, Jacob AJ, Bell JE, Brettle RP, Boon NA. A review of endocarditis in acquired immunodeficiency syndrome and human immunodeficiency virus infection. *Eur Heart J* 1995;16 Suppl B:15-8.
14. de Alarcon A, Villanueva JL. [Endocarditis in parenteral drug addicts. Right-sided endocarditis. Influence of HIV infection]. *Rev Esp Cardiol* 1998;51 Suppl 2:71-8.
15. Dressler FA, Roberts WC. Infective endocarditis in opiate addicts: analysis of 80 cases studied at necropsy. *Am J Cardiol* 1989;63(17):1240-57.

16. Dworkin RJ, Lee BL, Sande MA, Chambers HF. Treatment of right-sided Staphylococcus aureus endocarditis in intravenous drug users with ciprofloxacin and rifampicin. *Lancet* 1989;2(8671):1071-3.
17. Espinosa FJ, Valdes M, Martin-Luengo F, Arribas JP, Albaladejo J, Perez-Gracia A, et al. [Right endocarditis caused by Staphylococcus aureus in parenteral drug addicts: evaluation of a combined therapeutic scheme for 2 weeks versus conventional treatment]. *Enferm Infecc Microbiol Clin* 1993;11(5):235-40.
18. Faber M, Frimodt-Moller N, Espersen F, Skinhoj P, Rosdahl V. Staphylococcus aureus endocarditis in Danish intravenous drug users: high proportion of left-sided endocarditis. *Scand J Infect Dis* 1995;27(5): p483-7.
19. Fortun J, Perez-Molina J, Anon M, Martinez-Beltran J, Loza E, Guerrero A. Right-sided endocarditis caused by Staphylococcus aureus in drug abusers. *Antimicrob Agents Chemother* 1995;39(2):525-8.
20. Frontera J, Gradon J. Right-side endocarditis in injection drug users: review of proposed mechanisms of pathogenesis. *Clin Infect Dis* 2000;30(2): p374-9.
21. Fowler VG, Jr., Li J, Corey GR, Boley J, Marr KA, Gopal AK, et al. Role of echocardiography in evaluation of patients with Staphylococcus aureus bacteremia: experience in 103 patients. *J Am Coll Cardiol* 1997;30(4):1072-8.
22. Gabriel Botella F, Labios Gomez M, Balaguer Martinez JV, Vera Sempere G, Tormo Diaz M, Roda Ribera J. [Infectious endocarditis in parenteral drug addicts: study of 57 cases]. *An Med Interna* 1992;9(10):473-7.
23. 1. Ginzton L, Siegel R, Criley J. Natural history of tricuspid valve endocarditis: a two dimensional echocardiographic study. *Am J Cardiol* 1982;49(8): p1853-9.
24. 1. Hubbell G, Cheitlin MD, Rapaport E. Presentation, management, and follow-up evaluation of infective endocarditis in drug addicts. *Am Heart J* 1981;102(1):85-94.
25. Korzeniowski O, Sande MA. Combination antimicrobial therapy for Staphylococcus aureus endocarditis in patients addicted to parenteral drugs and in nonaddicts: A prospective study. *Ann Intern Med* 1982;97(4):496-503.
26. Levine DP, Crane LR, Zervos MJ. Bacteremia in narcotic addicts at the Detroit Medical Center. II. Infectious endocarditis: a prospective comparative study. *Rev Infect Dis* 1986;8(3):374-96.
27. Li JS, Sexton DJ, Mick N, Nettles R, Fowler VG, Jr., Ryan T, et al. Proposed modifications to the Duke criteria for the diagnosis of infective endocarditis. *Clin Infect Dis* 2000;30(4):633-8.  
1058-4838
28. Mah M, Shafran S. Polymicrobial endocarditis with eight pathogens in an intravenous drug abuser. *Scand J Infect Dis* 1990;22(6): p735-7.
29. 1. Manolis AS, Melita H. Echocardiographic and clinical correlates in drug addicts with infective endocarditis. Implications of vegetation size. *Arch Intern Med* 1988;148(11):2461-5.

30. Mylonakis E, Calderwood SB. Infective endocarditis in adults. *N Engl J Med* 2001;345(18):1318-30.
31. Nahass RG, Weinstein MP, Bartels J, Gocke DJ. Infective endocarditis in intravenous drug users: a comparison of human immunodeficiency virus type 1-negative and -positive patients. *J Infect Dis* 1990;162(4):967-70.
32. Palakodeti V, Keen W, Rickman L, Blanchard D. Eustachian valve endocarditis: detection with multiplane transesophageal echocardiography. *Clin Cardiol* 1997;20(6): p579-80.
33. Raoult D, Fournier PE, Drancourt M, Marrie TJ, Etienne J, Cosserat J, et al. Diagnosis of 22 new cases of Bartonella endocarditis. *Ann Intern Med* 1996;125(8):646-52.
34. Remetz M, Quagliarello V. Endovascular infections arising from right-sided heart structures. *Cardiol Clin* 1992;10(1):137-49.
35. Ribera E, Gomez-Jimenez J, Cortes E, del Valle O, Planes A, Gonzalez-Alujas T, et al. Effectiveness of cloxacillin with and without gentamicin in short-term therapy for right-sided Staphylococcus aureus endocarditis. A randomized, controlled trial. *Ann Intern Med* 1996;125(12):969-74.
36. Rivera DRJ, Flores R, Melendez J, Gomez M, Vila S, Hunter R. Profile of HIV patients with and without bacterial endocarditis. *Cell Mol Biol (Noisy-le-grand)* 1997;43(7): p1153-60.
37. Robbins M, Soeiro R, Frishman W, Strom J. Right-sided valvular endocarditis: etiology, diagnosis, and an approach to therapy. *Am Heart J* 1986;111(1): p128-35.
38. Scarvelis D, Malcolm I. Embolization of a huge tricuspid valve bacterial vegetation. *J Am Soc Echocardiogr* 2002;15(2): p185-7.
39. Shapiro S, Young E, Ginzton L, Bayer A. Pulmonic valve endocarditis as an underdiagnosed disease: role of transesophageal echocardiography. *J Am Soc Echocardiogr* 1992;5(1): p48-51.
40. 1. Sheikh M, Ali N, Covarrubias E, Fox L, Morjaria M, Dejo J. Right-sided infective endocarditis: an echocardiographic study. *Am J Med* 1979;66(2): p283-7.
41. Song MH, Usui M, Usui A, Watanabe T, Ueda Y. Giant vegetation mimicking cardiac tumor in tricuspid valve endocarditis after catheter ablation. *Jpn J Thorac Cardiovasc Surg* 2001;49(4):255-7.
42. Stagaman DJ, Presti C, Rees C, Miller DD. Septic pulmonary arteriovenous fistula. An unusual conduit for systemic embolization in right-sided valvular endocarditis. *Chest* 1990;97(6):1484-6.
43. Turek M, Karovitch A, Aaron S, Brais M. Persistent hypoxemia occurring as a complication of tricuspid valve endocarditis. *J Am Soc Echocardiogr* 2000;13(5): p412-4. 1.

44. Valencia OM, Enriquez CA, Guinea EJ, Gonzalez LJ. [Polymicrobial endocarditis: a clinical and evolutive study of 12 cases diagnosed during a 10-year period]. *Rev Clin Esp* 1997;197(4): p245-7.
45. Turek M, Karovitch A, Aaron S, Brais M. Persistent hypoxemia occurring as a complication of tricuspid valve endocarditis. *J Am Soc Echocardiogr* 2000;13(5): p412-4.
46. Zaroff J, Picard M. Transesophageal echocardiographic (TEE) evaluation of the mitral and tricuspid valves. *Cardiol Clin* 2000;18(4): p731-50.
47. Yee ES, Ulliyot DJ. Reparative approach for right-sided endocarditis. Operative considerations and results of valvuloplasty. *J Thorac Cardiovasc Surg* 1988;96(1):133-40.
